# Supplementary material
Source: PubMed Central journal article supplement (PMC6491274)

Supplementary Figure 1

PI3K-AKT SIGNALING PATHWAY

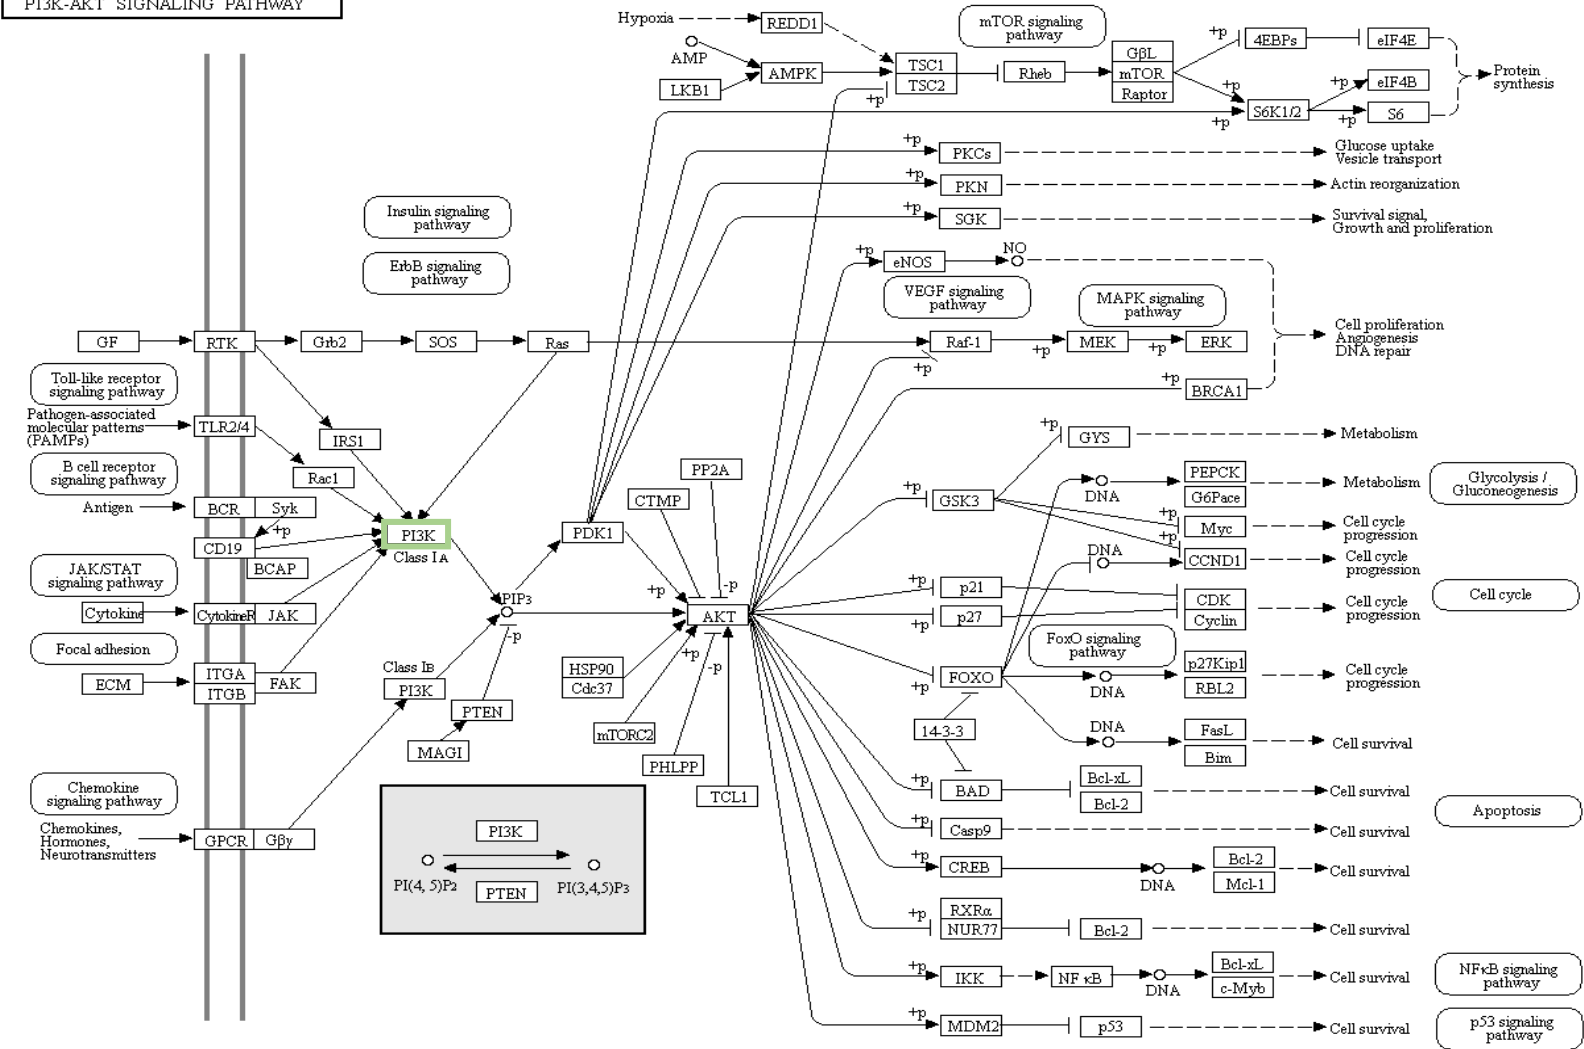

Supplement: NIHMS1511195-supplement-12035_2018_1417_MOESM2_ESM.pdf [file NIHMS1511195-supplement-12035_2018_1417_MOESM2_ESM.pdf]

Supplementary Figure 2

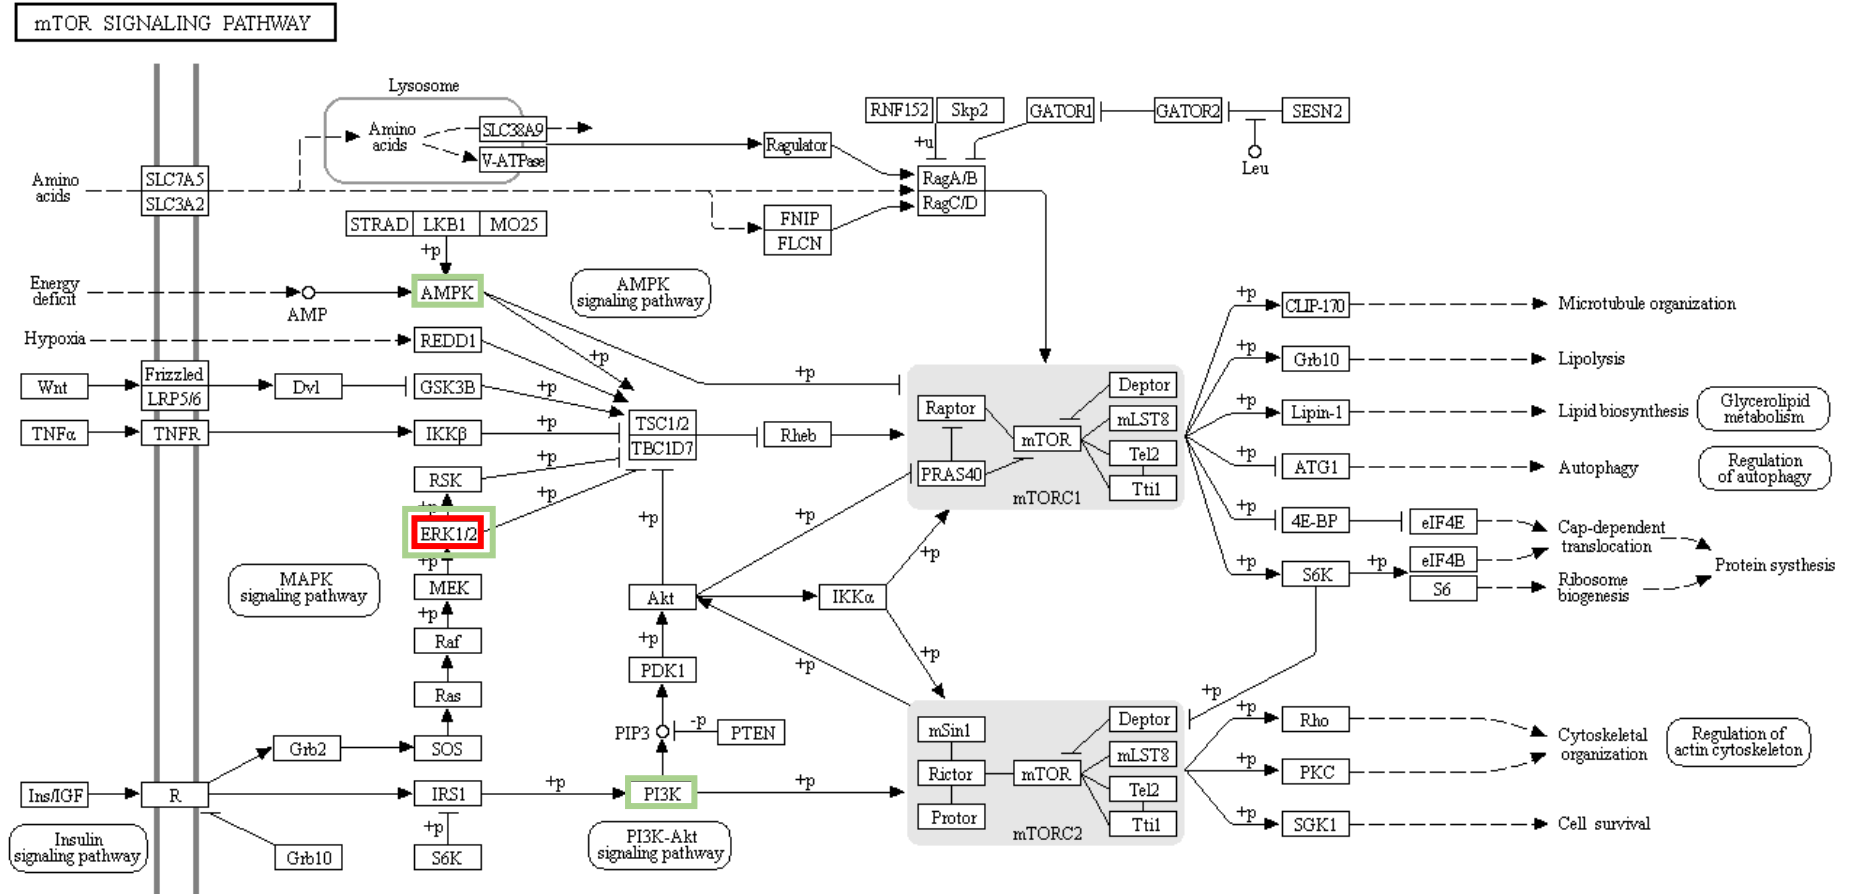

Supplement: NIHMS1511195-supplement-12035_2018_1417_MOESM3_ESM.pdf [file NIHMS1511195-supplement-12035_2018_1417_MOESM3_ESM.pdf]

Supplementary Figure 3

PHOSPHATIDYLINOSITOL SIGNALING SYSTEM

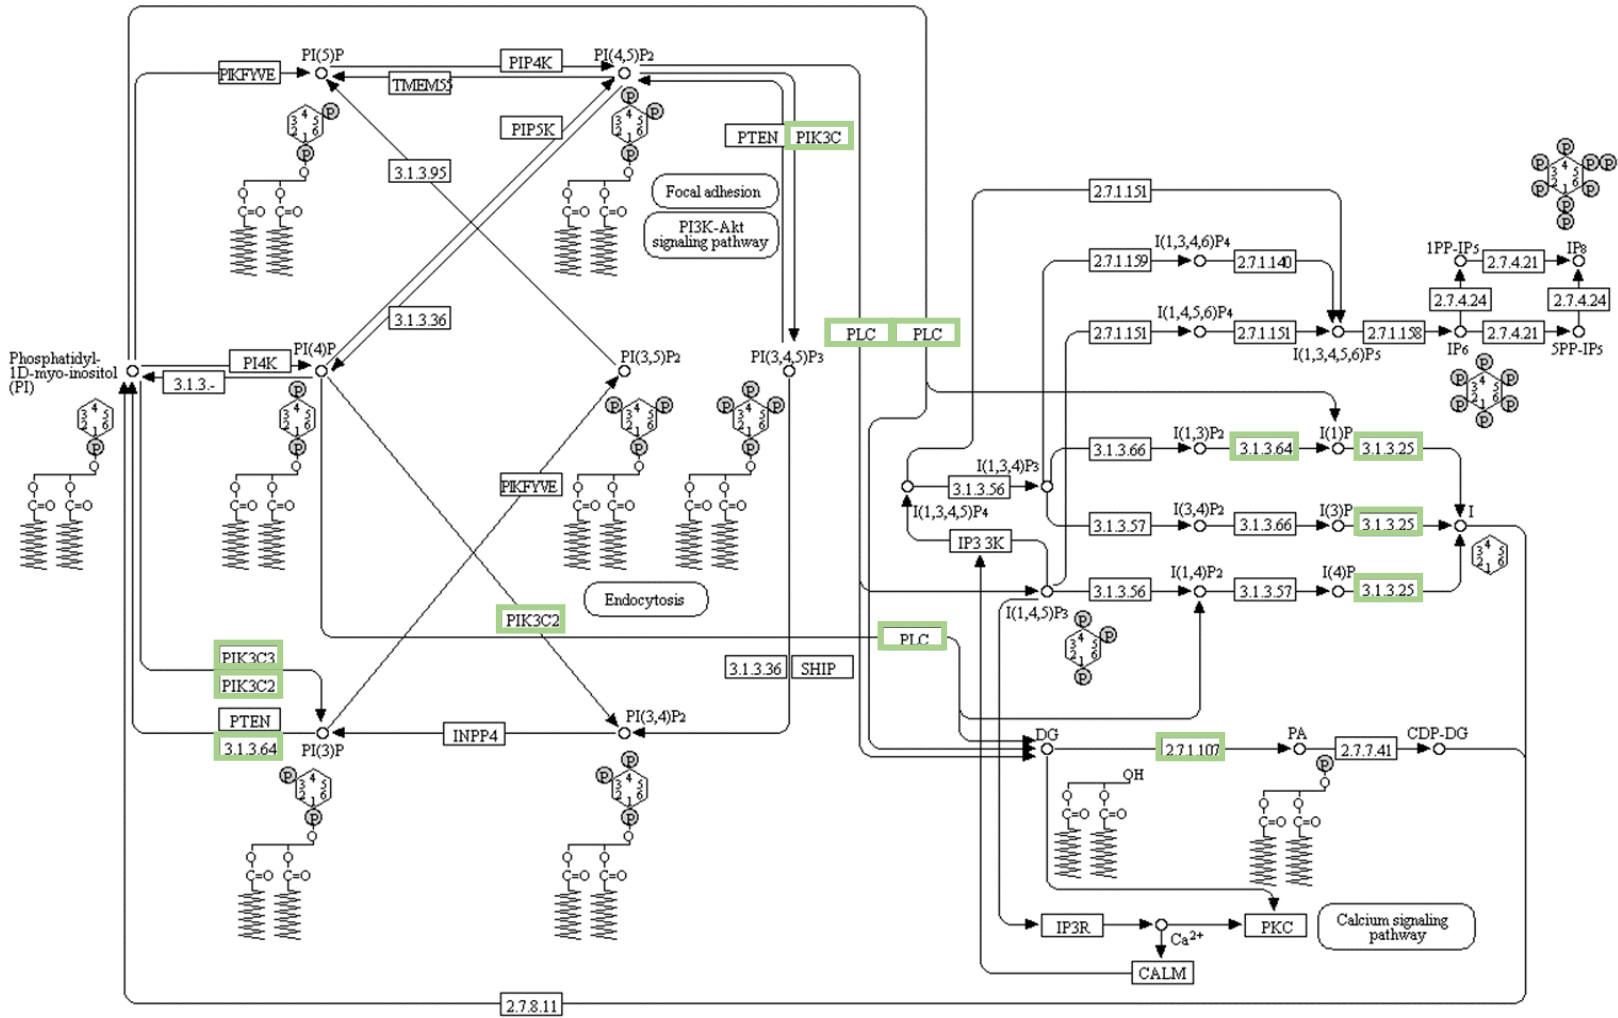

Supplement: NIHMS1511195-supplement-12035_2018_1417_MOESM4_ESM.pdf [file NIHMS1511195-supplement-12035_2018_1417_MOESM4_ESM.pdf]
